# Supplementary material
Source: PubMed Central journal article supplement (PMC3070593)
Supplement: mmc1.pdf [file mmc1.pdf]

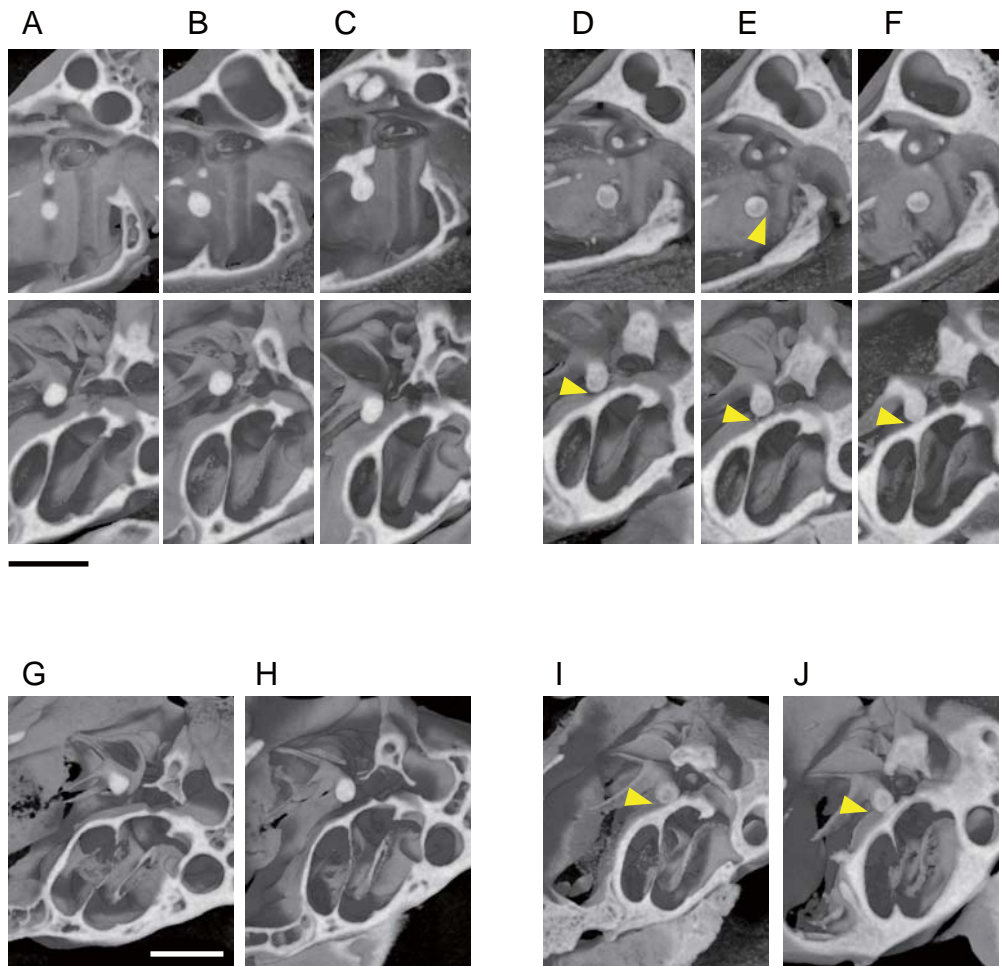

$\mu$ CT imaging of auditory ossicles in the middle ear of *Fos*<sup>-/-</sup> mice.

(A-F) Control (A +/-, B +/+, C +/-) and osteopetrotic (D -/-, E -/-, F -/-) mice (male, 31-36 weeks old) were obtained from mating of *Fos*<sup>+/-</sup> mice.

(Top panels) Lateral view of the middle ear cut on a parasagittal plane through the malleal processus brevis. Yellow arrowheads indicate malleal processus brevis in contact with the path of the stapedial artery.

(Lower panels) Inferior view of the middle ear cut on a horizontal plane through the malleal processus brevis. Yellow arrowheads indicate the malleal processus brevis in contact with the medial wall of the tympanic cavity (i.e., the lateral wall of the cochlea).

(G-J) Inferior view of the middle ear cut on a horizontal plane through the malleal processus brevis. Wild-type (G, 4-week-old; H, 16-week-old) and *Fos*<sup>-/-</sup> mice (I, 4-week-old; J, 16-week-old). Yellow arrowheads indicate the malleal processus brevis in contact with the medial wall of the tympanic cavity (i.e., the lateral wall of the cochlea).

See Figure 5 for more detailed description of structures.  
Scale bars, 1mm.
